# Supplementary material
Source: PubMed Central journal article supplement (PMC489970)

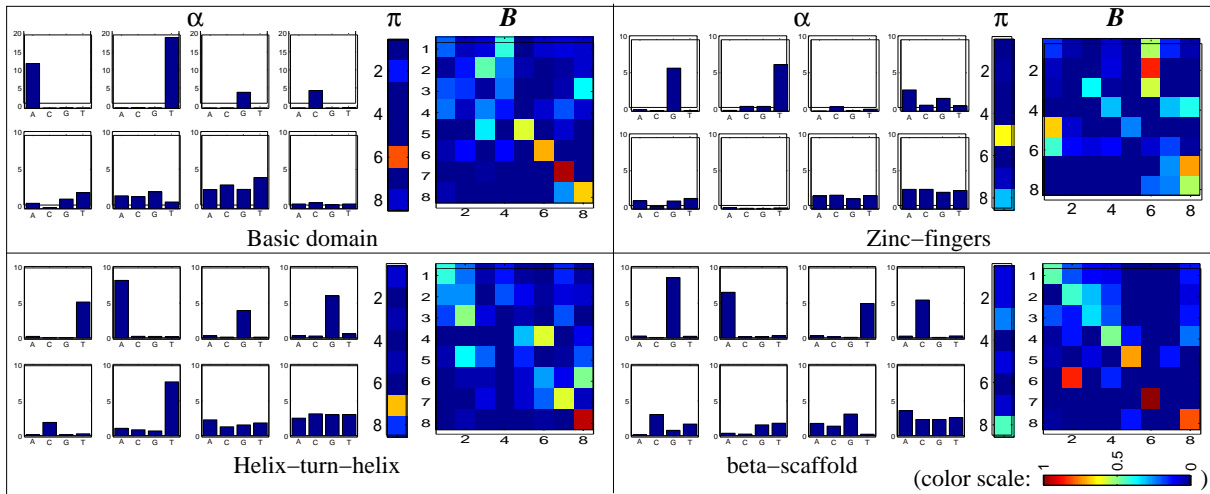

Supplement: pnas_101_29_10523__3.pdf [file pnas_101_29_10523__3.pdf]

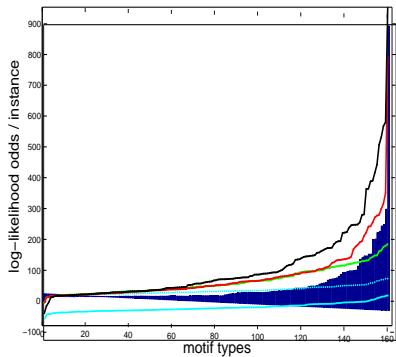

all motifs

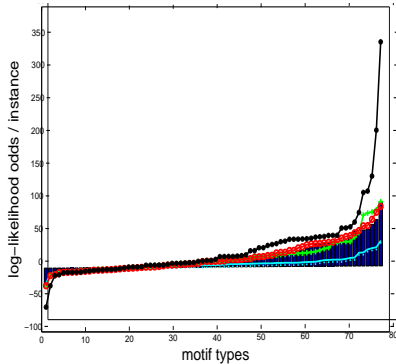

motifs with > 10 instances

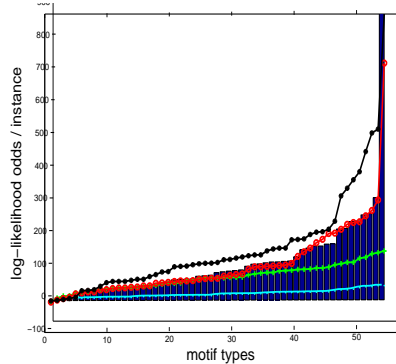

motifs with < 10 instances

Supplement: pnas_101_29_10523__4.pdf [file pnas_101_29_10523__4.pdf]
